# Supplementary material
Source: PubMed Central journal article supplement (PMC5732892)
Supplement: NIHMS880065-supplement-s1.pdf [file NIHMS880065-supplement-s1.pdf]

Table S1. List of drugs (generic names) in each drug class category

| <b>Glaucoma</b>                | <b>Ocular Inflammation</b>     | <b>Ocular Infection</b>        |
|--------------------------------|--------------------------------|--------------------------------|
| ACETAZOLAMIDE                  | BROMFENAC SODIUM               | ACYCLOVIR                      |
| APRACLONIDINE HCL              | DEXAMETHASONE                  | BACITRACIN                     |
| BETAXOLOL HCL                  | DEXAMETHASONE SOD PHOSPHATE    | BACITRACIN/POLYMYXIN B SULFATE |
| BIMATOPROST                    | DIFLUPREDNATE                  | BESIFLOXACIN HCL               |
| BRIMONIDINE TARTRATE           | FLUOROMETHOLONE                | CIPROFLOXACIN HCL              |
| BRIMONIDINE TARTRATE/TIMOLOL   | FLUOROMETHOLONE ACETATE        | CIPROFLOXACIN HCL/DEXAMETH     |
| BRINZOLAMIDE                   | FLURBIPROFEN SODIUM            | DOXYCYCLINE HYCLATE            |
| BRINZOLAMIDE/BRIMONID TART     | KETOROLAC TROMETHAMINE         | ERYTHROMYCIN BASE              |
| CARTEOLOL HCL                  | KETOROLAC TROMETHAMINE/PF      | FAMCICLOVIR                    |
| DORZOLAMIDE HCL                | LOTEPREDNOL ETABONATE          | GANCICLOVIR                    |
| DORZOLAMIDE HCL/TIMOLOL MALEAT | NEPAFENAC                      | GANCICLOVIR SODIUM             |
| DORZOLAMIDE/TIMOLOL/PF         | PREDNISOLONE ACETATE           | GATIFLOXACIN                   |
| ECHOTHIOPHATE IODIDE           | RIMEXOLONE                     | GENTAMICIN SULFATE             |
| LATANOPROST                    | TRIAMCINOLONE ACETONIDE        | GENTAMICIN/PREDNISOL AC        |
| LEVOBUNOLOL HCL                |                                | LEVOFLOXACIN                   |
| METHAZOLAMIDE                  | <b>Dry Eye</b>                 | MOXIFLOXACIN HCL               |
| PILOCARPINE HCL                | CYCLOSPORINE                   | NATAMYCIN                      |
| TAFLUPROST/PF                  | DOXY/EYELID CLNS #3/EYE EML #1 | NEO/POLYMYX B SULF/DEXAMETH    |
| TIMOLOL                        | DOXYCYCLINE MONOHYDRATE        | NEOMY SULF/BACITRA/POLYMYXIN B |
| TIMOLOL MALEATE                | HYDROXYPROPYL CELLULOSE        | NEOMY SULF/BACITRAC ZN/POLY/HC |
| TIMOLOL MALEATE/PF             | OMEGA-3 ACID ETHYL ESTERS      | NEOMYCIN/POLYMYXN B/GRAMICIDIN |
| TRAVOPROST                     |                                | NYSTATIN                       |
| TRAVOPROST (BENZALKONIUM)      | <b>Other, Ophthalmic</b>       | OFLOXACIN                      |
| UNOPROSTONE ISOPROPYL          | ACETAMINOPHEN WITH CODEINE     | POLYMYXIN B SULF/TRIMETHOPRIM  |
|                                | AFLIBERCEPT                    | SULFACETAMIDE SODIUM           |
| <b>Allergic Conjunctivitis</b> | BEVACIZUMAB                    | SULFACETAMIDE/PREDNISOLONE SP  |
| ALCAFTADINE                    | LIDOCAINE                      | SULFACETM NA/PREDNISOL AC      |
| BEPOTASTINE BESILATE           | PROPARACAINE HCL               | TOBRAMYCIN                     |
| CROMOLYN SODIUM                | RANIBIZUMAB                    | TOBRAMYCIN/DEXAMETHASONE       |
| EPINASTINE HCL                 | TETRACAINE HCL/PF              | TOBRAMYCIN/LOTEPRED ETAB       |
| LEVOCETIRIZINE DIHYDROCHLORIDE |                                | TRIFLURIDINE                   |
| LODOXAMIDE TROMETHAMINE        | <b>Mydriatics</b>              | VALACYCLOVIR HCL               |
| NEDOCROMIL SODIUM              | ATROPINE SULFATE               | VALGANCICLOVIR HCL             |
| OLOPATADINE HCL                | HOMATROPINE HBR                |                                |
|                                | PHENYLEPHRINE HCL              |                                |
|                                | TROPICAMIDE                    |                                |
