# Supplementary material
Source: PubMed Central journal article supplement (PMC5732892)
Supplement: NIHMS880065-supplement-s2.pdf [file NIHMS880065-supplement-s2.pdf]

Table S2. Therapeutic substitutions

| <b>Drug Name</b>               | <b>Generic Name</b>          | <b>Drug Class</b>   | <b>Therapeutic Substitution</b>         |
|--------------------------------|------------------------------|---------------------|-----------------------------------------|
| APRACLONIDINE HCL              | APRACLONIDINE HCL            | Glaucoma            | BRIMONIDINE TARTRATE                    |
| IOPIDINE                       | APRACLONIDINE HCL            | Glaucoma            | BRIMONIDINE TARTRATE                    |
| SIMBRINZA                      | BRINZOLAMIDE/BRIMONID TART   | Glaucoma            | BRIMONIDINE TARTRATE + DORZOLAMIDE HCL  |
| COMBIGAN                       | BRIMONIDINE TARTRATE/TIMOLOL | Glaucoma            | BRIMONIDINE TARTRATE + TIMOLOL          |
| AZOPT                          | BRINZOLAMIDE                 | Glaucoma            | DORZOLAMIDE HCL                         |
| LUMIGAN                        | BIMATOPROST                  | Glaucoma            | LATANOPROST                             |
| RESCULA                        | UNOPROSTONE ISOPROPYL        | Glaucoma            | LATANOPROST                             |
| TRAVATAN Z                     | TRAVOPROST                   | Glaucoma            | LATANOPROST                             |
| TRAVOPROST                     | TRAVOPROST (BENZALKONIUM)    | Glaucoma            | LATANOPROST                             |
| ALREX                          | LOTEPREDNOL ETABONATE        | Ocular Inflammation | FLUOROMETHOLONE                         |
| LOTEMAX                        | LOTEPREDNOL ETABONATE        | Ocular Inflammation | FLUOROMETHOLONE                         |
| BROMDAY                        | BROMFENAC SODIUM             | Ocular Inflammation | KETOROLAC TROMETHAMINE                  |
| BROMFENAC SODIUM               | BROMFENAC SODIUM             | Ocular Inflammation | KETOROLAC TROMETHAMINE                  |
| ILEVRO                         | NEPAFENAC                    | Ocular Inflammation | KETOROLAC TROMETHAMINE                  |
| NEVANAC                        | NEPAFENAC                    | Ocular Inflammation | KETOROLAC TROMETHAMINE                  |
| PROLENSA                       | BROMFENAC SODIUM             | Ocular Inflammation | KETOROLAC TROMETHAMINE                  |
| DEXAMETHASONE                  | DEXAMETHASONE                | Ocular Inflammation | PREDNISOLONE ACETATE                    |
| DEXAMETHASONE SODIUM PHOSPHATE | DEXAMETHASONE SOD PHOSPHATE  | Ocular Inflammation | PREDNISOLONE ACETATE                    |
| DUREZOL                        | DIFLUPREDNATE                | Ocular Inflammation | PREDNISOLONE ACETATE                    |
| MAXIDEX                        | DEXAMETHASONE                | Ocular Inflammation | PREDNISOLONE ACETATE                    |
| VEXOL                          | RIMEXOLONE                   | Ocular Inflammation | PREDNISOLONE ACETATE                    |
| CIPRODEX                       | CIPROFLOXACIN HCL/DEXAMETH   | Ocular Infections   | CIPROFLOXACIN HCL+PREDNISOLONE ACETATE  |
| PRED-G                         | GENTAMICIN/PREDNISOL AC      | Ocular Infections   | GENTAMICIN SULFATE+PREDNISOLONE ACETATE |
| TOBRADEX                       | TOBRAMYCIN/DEXAMETHASONE     | Ocular Infections   | NEOMYCIN-POLYMYXIN-DEXAMETH             |
| TOBRADEX ST                    | TOBRAMYCIN/DEXAMETHASONE     | Ocular Infections   | NEOMYCIN-POLYMYXIN-DEXAMETH             |
| TOBRAMYCIN-DEXAMETHASONE       | TOBRAMYCIN/DEXAMETHASONE     | Ocular Infections   | NEOMYCIN-POLYMYXIN-DEXAMETH             |
| ZYLET                          | TOBRAMYCIN/LOTEPRED ETAB     | Ocular Infections   | NEOMYCIN-POLYMYXIN-DEXAMETH             |
| ZIRGAN                         | GANCICLOVIR                  | Ocular Infections   | TRIFLURIDINE                            |
| EYLEA                          | AFLIBERCEPT                  | Other, Ophthalmic   | BEVACIZUMAB                             |
| LUCENTIS                       | RANIBIZUMAB                  | Other, Ophthalmic   | BEVACIZUMAB                             |
